# Supplementary material for: Extensive range persistence in peripheral and interior refugia characterizes Pleistocene range dynamics in a widespread Alpine plant species (Senecio carniolicus, Asteraceae)
Source: PubMed Central journal article supplement (PMC3306793; doi:10.1111/j.1365-294x.2012.05456.x), 2012-03
Supplement: mec0021-1255-SD1.pdf [file mec0021-1255-SD1.pdf]

## Supplementary Material

### Appendix 1 Details of the phylogenetic analyses of ITS sequences of the *Incani*-clade.

A data set of ITS sequences including one representative of each *S. carniolicus* population (Table 1) as well as 1–2 samples of other species of the *Incani*-clade (for details on sampling locations and their coordinates, voucher information, and on GenBank accession numbers, see table below) was constructed. For the maximum parsimony analyses, heuristic searches were conducted employing 1000 random sequence addition replicates and TBR branch swapping. Branch support was assessed by bootstrapping with 1000 pseudo-replicates, each with 10 random sequence addition replicates and TBR branch swapping saving 100 trees per replicate. The best-fit substitution model, determined via hierarchical likelihood ratio tests and the AIC as implemented in ModelTest 3.6 (Posada & Crandall 1998), was F81+I+G. For Bayesian inference, four runs with one cold and three heated chains each were run for  $5 \times 10^6$  generations, sampling every 1000th generation. The first 25% of trees were discarded as burn-in, after which tree likelihoods and model parameters had reached stationarity. Clade posterior probabilities were calculated computing a 50% majority-rule consensus tree of the remaining 15,000 trees.

| Taxon                                | Voucher Information                           | Coordinates                | Accession No. |
|--------------------------------------|-----------------------------------------------|----------------------------|---------------|
| <i>Senecio abrotanifolius</i> L. 1   | Croatia, Zadar, Velebit                       | N 44°31'45"<br>E 15°12'51" | HE585514      |
| <i>Senecio abrotanifolius</i> L. 2   | Italy, Sondrio, Bernina                       | N 46°11'40"<br>E 9°33'50"  | HE585515      |
| <i>Senecio adonidifolius</i> Loisel. | France, Pyrénées-Orientales,<br>East Pyrenees | N 42°29'<br>E 2°19'        | HE585517      |
| <i>Senecio boissieri</i> DC.         | Spain, Granada, Mulhacén                      | N 37°03'14"<br>W 03°01'33" | HE585519      |
| <i>Senecio halleri</i> Dandy         | Italy, Aosta, Col d'Olen                      | N 45°51'48"<br>E 7°51'03"  | HE585521      |
| <i>Senecio incanus</i> L. 1          | Switzerland, Valais,<br>Simplonpass           | N 46°14'45"<br>E 08°01'30" | HE585522      |
| <i>Senecio incanus</i> L. 2          | Switzerland, Hérens,<br>Montagne d'Arolla     | N 46°00'57"<br>E 07°26'15" | HE586331      |
| <i>Senecio leucophyllus</i> DC.      | France, Pyrénées Orientales,<br>Plas de Cady  | N 42°30'30"<br>E 2°26'     | HE585524      |
| <i>Senecio persoonii</i> De Not.     | Italy, Cuneo, Viozene                         | N 44°08'45"<br>E 7°47'05"  | HE585526      |

### Reference

Posada D, Crandall KA (1998) MODELTEST: testing the model of DNA substitution. *Bioinformatics*, **14**, 817–818.

**Fig. S1** Phylogenetic relationships of *Senecio carniolicus* and related species inferred from Bayesian analysis of nuclear ITS sequences (the outgroup *S. jacobaea* [GU818563-67] not shown). Numbers above branches are branch lengths (number of steps), those below branches are maximum parsimony bootstrap values / Bayesian posterior probabilities.

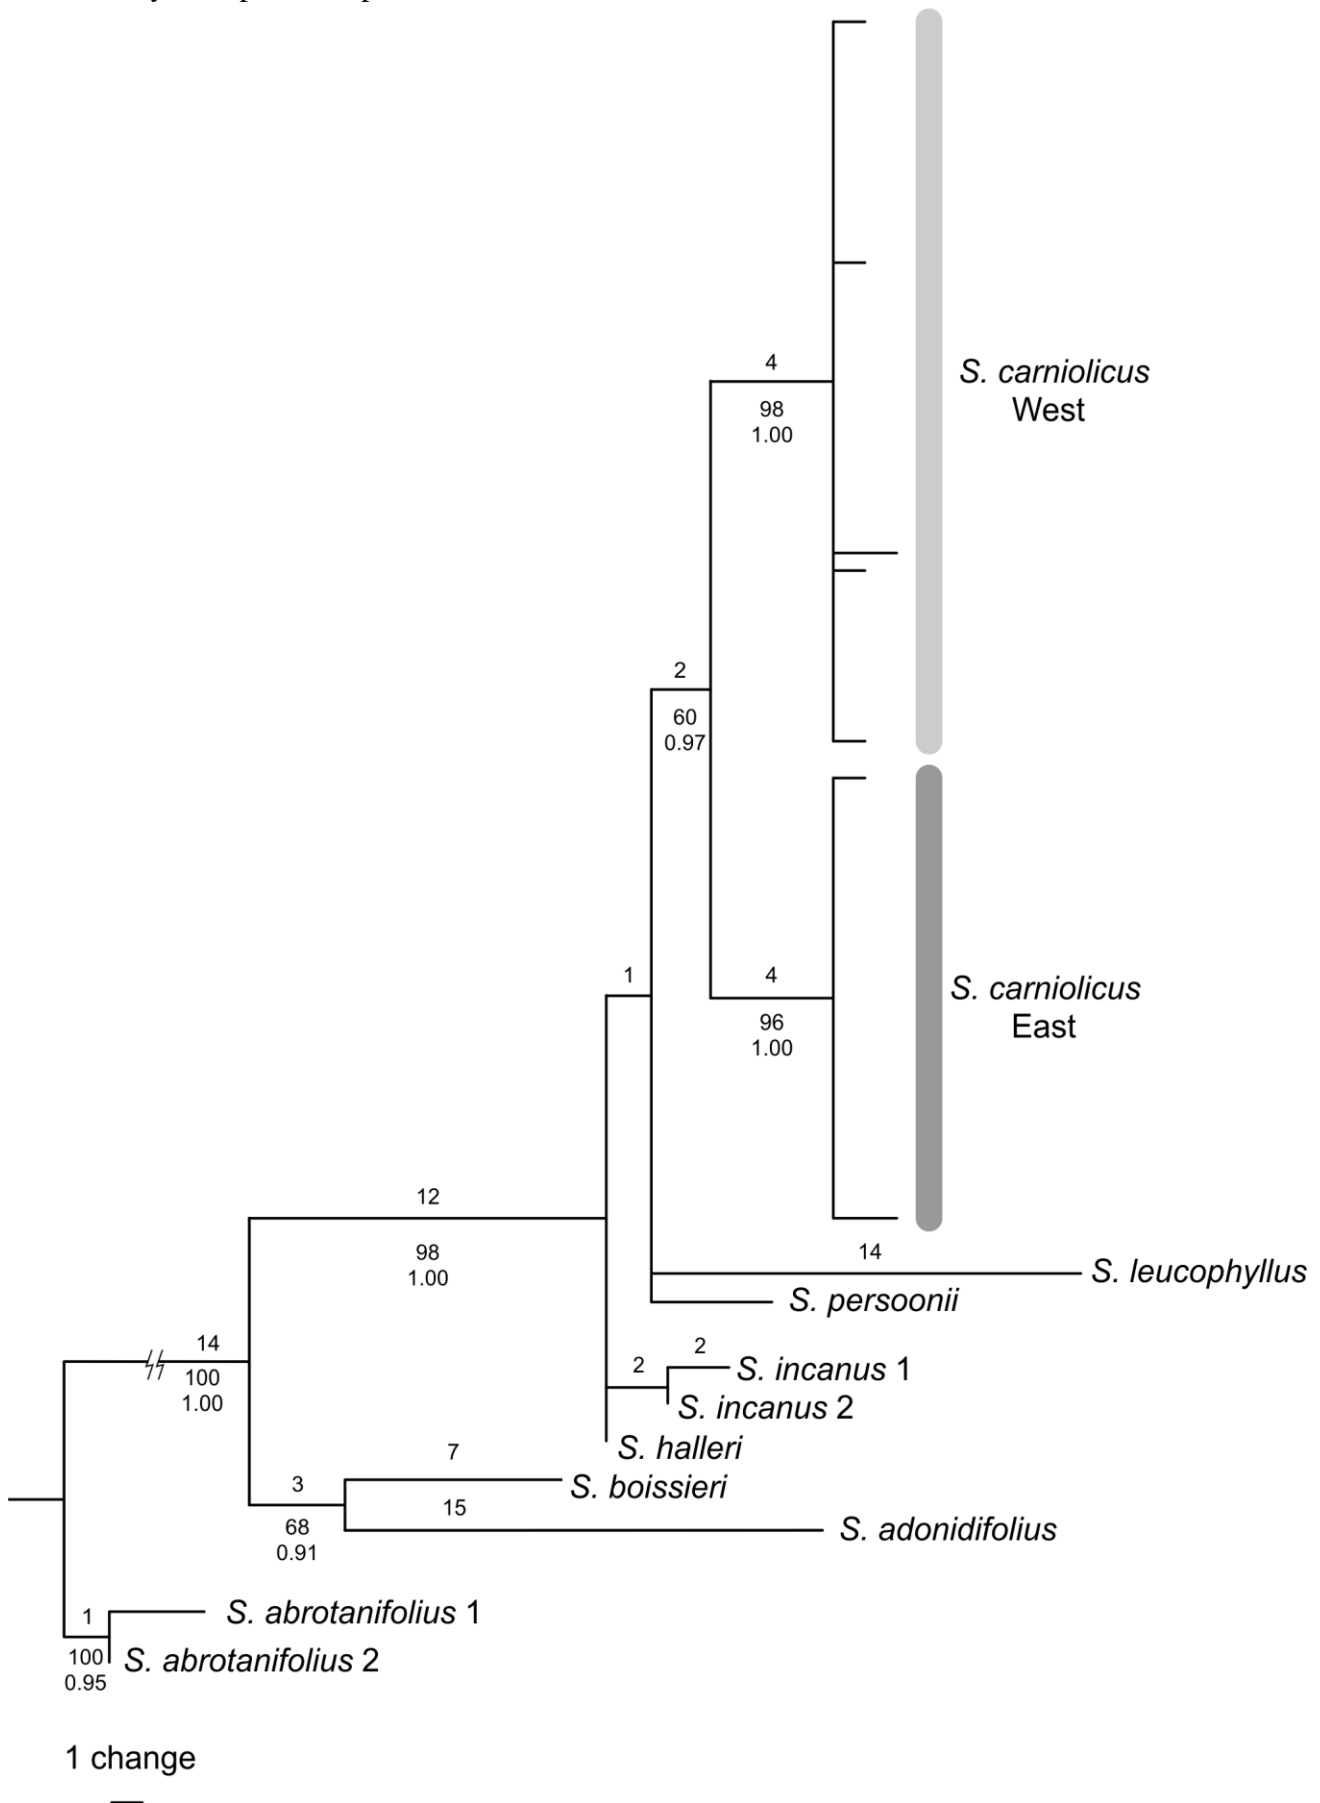

**Fig. S2** Population dendrogram based on agglomerative hierarchical clustering using geographic distances. The two distance cut-offs (ca. 40 and ca. 70 km) and the corresponding circumscription of geographic regions (R1 to R13) are indicated. Population acronyms as in Table S1.

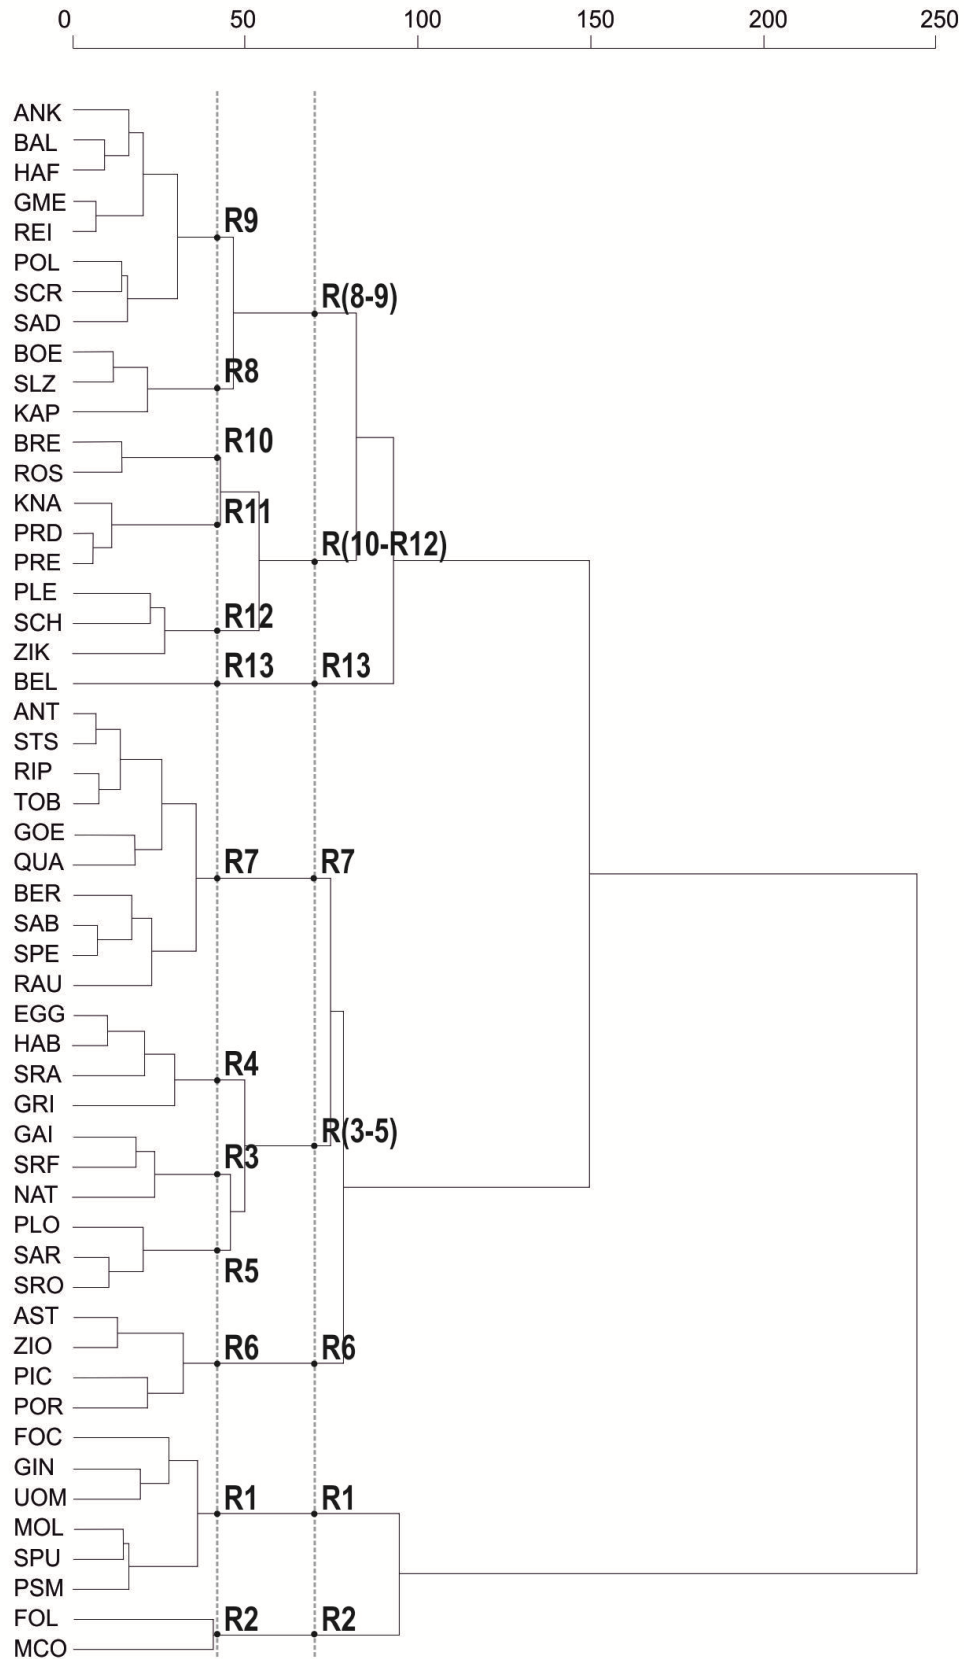

**Fig. S3** Principal coordinate analysis (PCoA) of a matrix of pairwise Nei72 distances derived from AFLP analysis of diploid *Senecio carniolicus*.

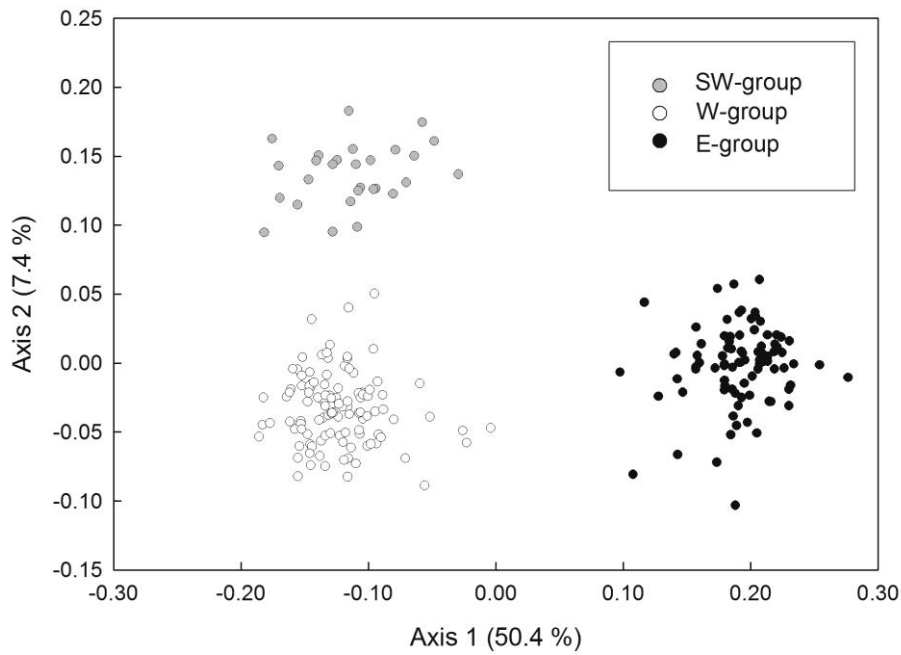

**Fig. S4** Population Graphs network illustrating the genetic covariance structure among populations in diploid *Senecio carniolicus*. Populations are connected by edges if their genetic structures are conditionally dependent. Normal edges are those where the physical distances are proportional to the genetic distances. If they are not, then the populations are either closer (compressed edges) or further apart (extended edges) than expected given the genetic distances. Populations are numbered as in Fig. 1.

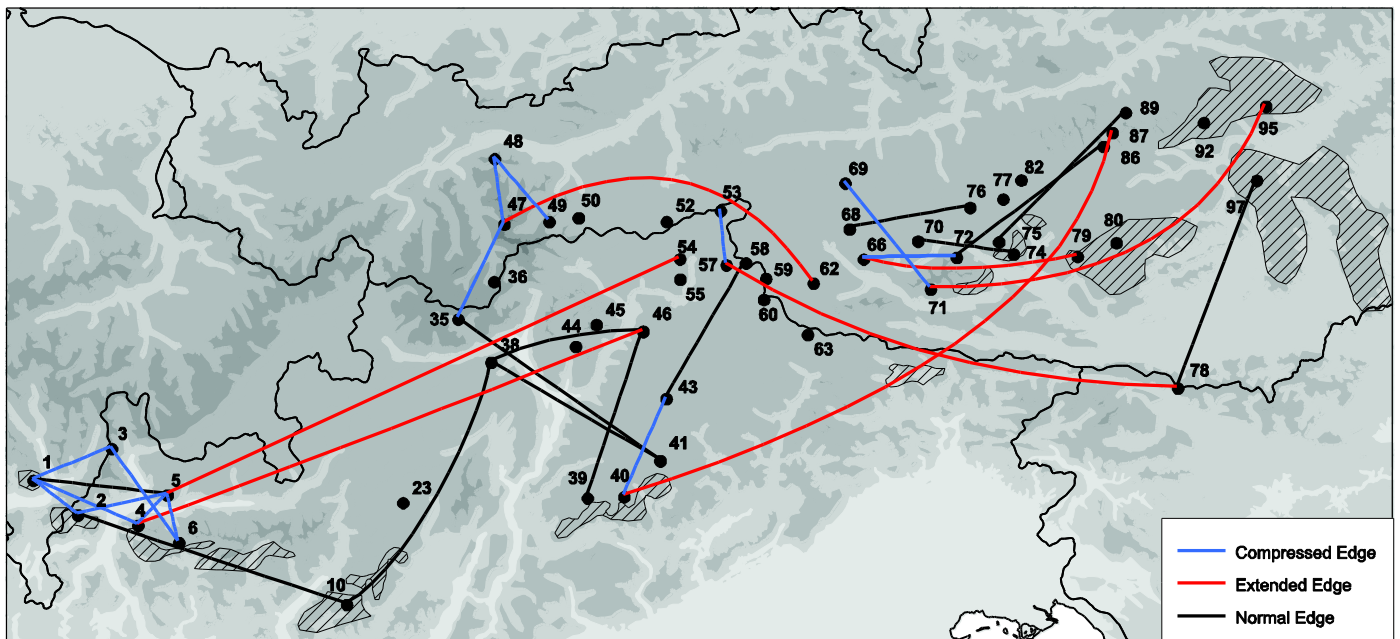

**Fig. S5** Bayes Factor support for diffusion rates in a discrete non-reversible geographic diffusion model involving (a) 13 or (b) 8 discrete geographical regions. Source and sink regions are arranged on the x- and y-axis, respectively, Bayes Factors are shown on the z-axis. Prior means of the Poisson distribution are indicated beneath each panel (the default one in red); panels with means of 1 or more are shown twice to aid legibility (due to excessively high Bayes factors at mean 0.1).

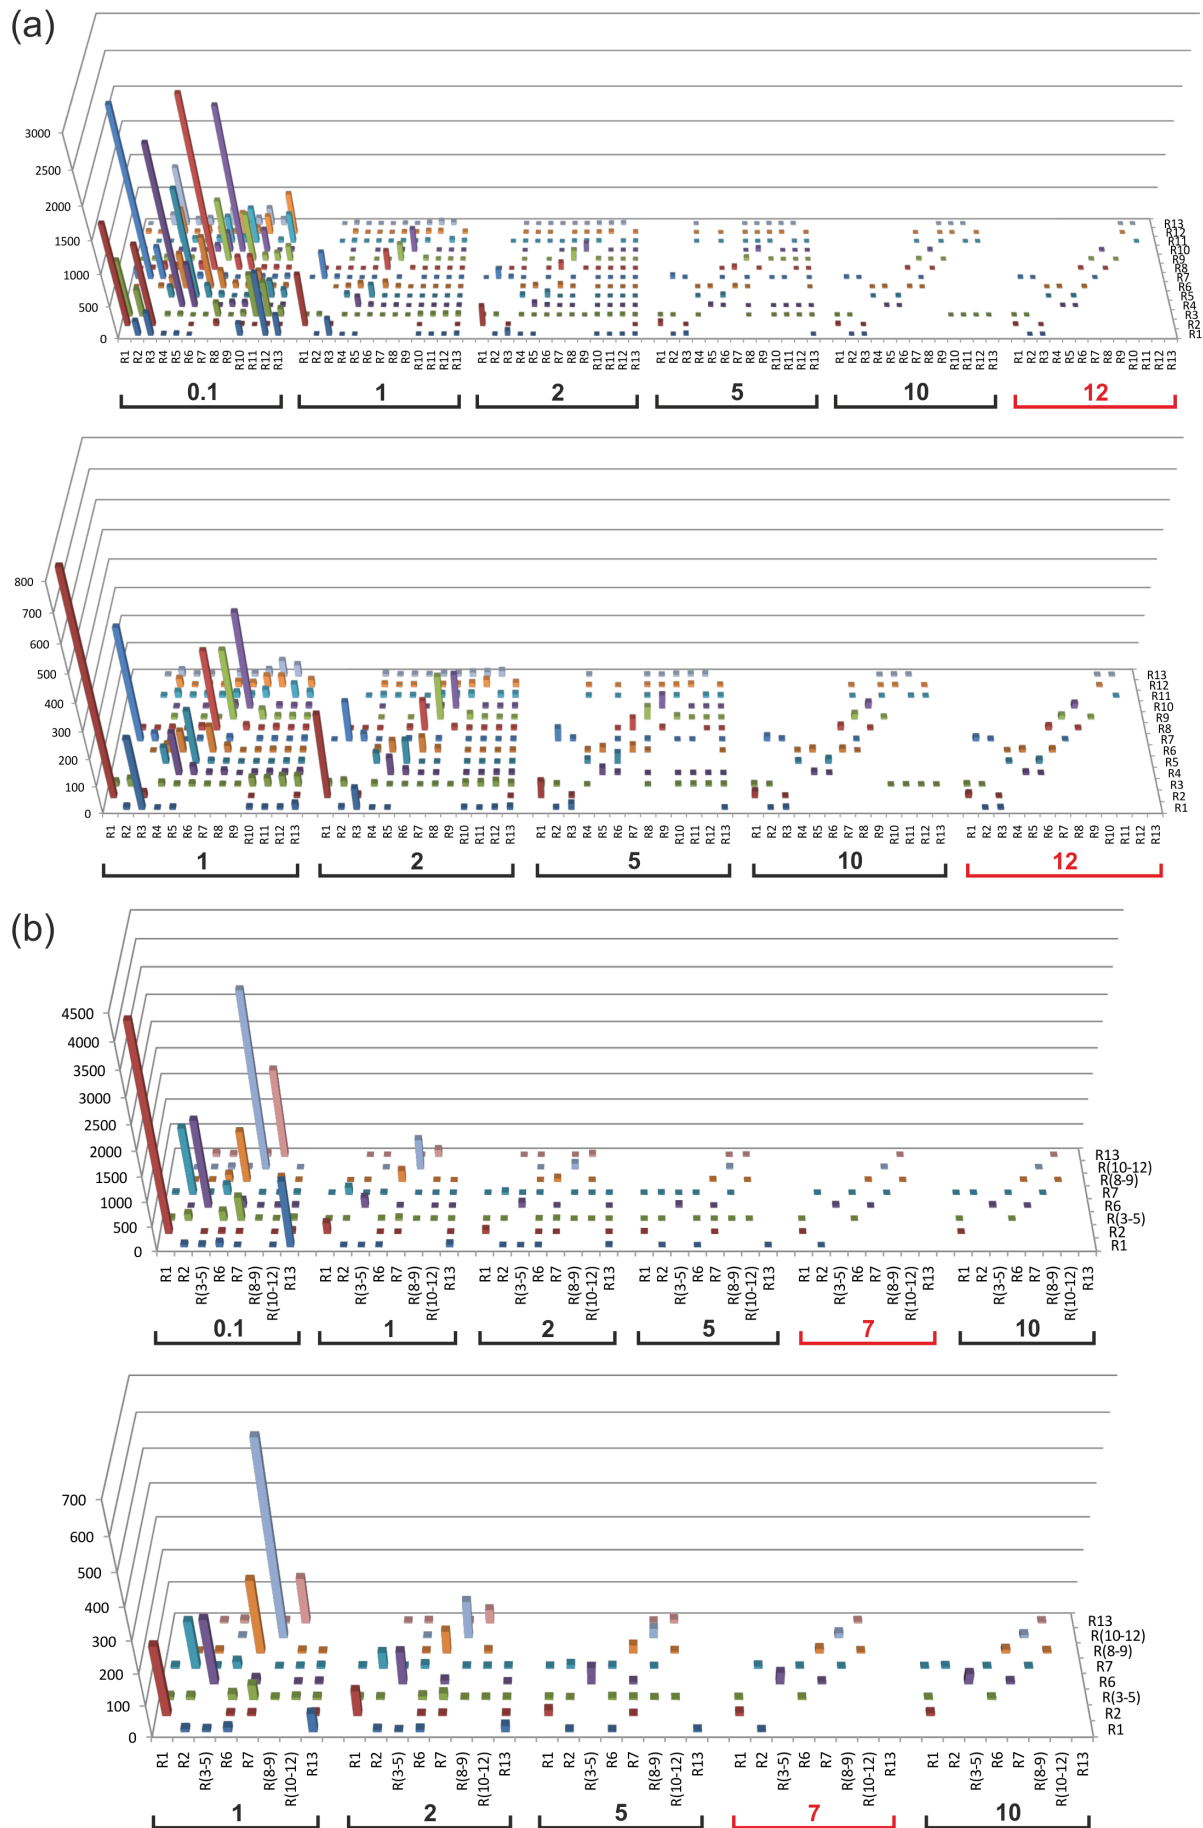

**Table S1** Population numbers and acronyms, sampling locations and their coordinates, number of analyzed individuals, population diversity measures, ITS ribotypes, plastid haplotypes, and GenBank accession numbers for diploid *Senecio carniolicus*.

| Population number <sup>a</sup> | Population acronym | Locality (coordinates) <sup>b</sup>               | N <sub>AFLP</sub> | DW <sup>c</sup> | ITS ribotype | N <sub>cpDNA</sub> | Plastid haplotype <sup>d</sup>                            | Π <sup>e</sup> | GenBank accession numbers <sup>f</sup>                                                              |
|--------------------------------|--------------------|---------------------------------------------------|-------------------|-----------------|--------------|--------------------|-----------------------------------------------------------|----------------|-----------------------------------------------------------------------------------------------------|
| 1                              | UOM                | CH: Cima dell Uomo<br>(N 46.23° E 8.94°)          | 4                 | 0.99            | 1            | 4                  | H13                                                       | 0.00           | FR796910–FR796913; FR797128–FR797131;<br>FR797346–FR797349; FR797564–FR797567;<br>FR797782–FR797785 |
| 2                              | GIN                | IT: Pizzo di Gino<br>(N 46.12° E 9.14°)           | 4                 | 1.00            | 1            | 4                  | H12 <sub>2</sub> , H15 <sub>2</sub>                       | 1.33           | FR796752–FR796755; FR796970–FR796973;<br>FR797188–FR797191; FR797406–FR797409;<br>FR797624–FR797627 |
| 3                              | FOC                | IT: Campanile di Val Marina<br>(N 46.33° E 9.29°) | 4                 | 1.00            | 1            | 4                  | H12 <sub>2</sub> , H13 <sub>1</sub> ,<br>H18 <sub>1</sub> | 1.67           | FR796737–FR796740; FR796957–FR796960;<br>FR797175–FR797178; FR797393–FR797396;<br>FR797611–FR797614 |
| 4                              | MOL                | IT: Monte Legnone<br>(N 46.09° E 9.42°)           | 4                 | 1.25            | 1            | 4                  | H13                                                       | 0.00           | FR796790–FR796793; FR797007–FR797010;<br>FR797225–FR797228; FR797443–FR797446;<br>FR797661–FR797664 |
| 5                              | SPU                | IT: Passo Locino<br>(N 46.19° E 9.55°)            | 8                 | 1.09            | 1            | 7                  | H13 <sub>6</sub> , H18 <sub>1</sub>                       | 0.57           | FR796884–FR796891; FR797103–FR797109;<br>FR797321–FR797327; FR797539–FR797545;<br>FR797757–FR797763 |
| 6                              | PSM                | IT: Monte Verrobbio<br>(N 46.04° E 9.60°)         | 4                 | 1.29            | 1            | 4                  | H14                                                       | 0.00           | FR796828–FR796831; FR797046–FR797049;<br>FR797264–FR797267; FR797482–FR797485;<br>FR797700–FR797703 |
| 10                             | MCO                | IT: Monte Colombine<br>(N 45.85° E 10.36°)        | 4                 | 1.26            | 1            | 4                  | H2 <sub>3</sub> , H17 <sub>1</sub>                        | 4.00           | FR796786–FR796789; FR797003–FR797006;<br>FR797221–FR797224; FR797439–FR797442;<br>FR797657–FR797660 |
| 23                             | FOL                | IT: Cresta del Belvedere<br>(N 46.16° E 10.62°)   | 7                 | 1.03            | 1            | 5                  | H13 <sub>1</sub> , H17 <sub>4</sub>                       | 0.40           | FR796741–FR796747; FR796961–FR796965;<br>FR797179–FR797183; FR797397–FR797401;<br>FR797615–FR797619 |
| 35                             | SRF                | IT: Schröfwand<br>(N 46.74° E 10.87°)             | 2                 | 1.02            | 1            | 2                  | H17                                                       | 0.00           | FR796896–FR796897; FR797114–FR797115;<br>FR797332–FR797333; FR797550–FR797551;<br>FR797768–FR797769 |
| 36                             | GAI                | AT: Festkogel<br>(N 46.86° E 11.04°)              | 4                 | 0.93            | 1, 3         | 4                  | H35                                                       | 0.00           | FR796748–FR796751; FR796966–FR796969;<br>FR797184–FR797187; FR797402–FR797405;<br>FR797620–FR797623 |

|    |     |                                                      |   |      |   |   |                                                           |       |                                                                                                     |
|----|-----|------------------------------------------------------|---|------|---|---|-----------------------------------------------------------|-------|-----------------------------------------------------------------------------------------------------|
| 38 | NAT | IT: Naturnser Hochwart<br>(N 46.6° E 11.02°)         | 4 | 1.08 | 1 | 4 | H19 <sub>1</sub> , H35 <sub>3</sub>                       | 1.00  | FR796794–FR796797; FR797011–FR797014;<br>FR797229–FR797232; FR797447–FR797450;<br>FR797665–FR797668 |
| 39 | ZIO | IT: Monte Ziolera<br>(N 46.17° E 11.45°)             | 4 | 1.24 | 1 | 4 | H10 <sub>1</sub> , H35 <sub>3</sub>                       | 6.00  | FR796918–FR796921; FR797136–FR797139;<br>FR797354–FR797357; FR797572–FR797575;<br>FR797790–FR797793 |
| 40 | AST | IT: Cima D'Asta<br>(N 46.17° E 11.62°)               | 2 | 1.27 | 1 | 2 | H9 <sub>1</sub> , H23 <sub>1</sub>                        | 10.00 | FR796930–FR796931; FR797148–FR797149;<br>FR797366–FR797367; FR797584–FR797585                       |
| 41 | PIC | IT: Cavallazza Piccola<br>(N 46.28° E 11.78°)        | 4 | 1.46 | 1 | 4 | H1 <sub>1</sub> , H35 <sub>3</sub>                        | 4.50  | FR796798–FR796801; FR797015–FR797018;<br>FR797233–FR797236; FR797451–FR797454;<br>FR797669–FR797672 |
| 43 | POR | IT: Pre de Ciapel<br>(N 46.48° E 11.82°)             | 4 | 0.96 | 1 | 4 | H35                                                       | 0.00  | FR796814–FR796817; FR797031–FR797034;<br>FR797249–FR797252; FR797467–FR797470;<br>FR797685–FR797688 |
| 44 | SAR | IT: Sarner Scharte<br>(N 46.65° E 11.41°)            | 4 | 1.00 | 1 | 4 | H22 <sub>1</sub> , H35 <sub>3</sub>                       | 1.00  | FR796860–FR796863; FR797082–FR797085;<br>FR797300–FR797303; FR797518–FR797521;<br>FR797736–FR797739 |
| 45 | SRO | IT: Schrotthorn<br>(N 46.72° E 11.51°)               | 4 | 1.11 | 1 | 4 | H22 <sub>1</sub> , H23 <sub>1</sub> ,<br>H35 <sub>2</sub> | 1.17  | FR796898–FR796901; FR797116–FR797119;<br>FR797334–FR797337; FR797552–FR797555;<br>FR797770–FR797773 |
| 46 | PLO | IT: Plose<br>(N 46.69° E 11.72°)                     | 4 | 1.07 | 1 | 4 | H9 <sub>1</sub> , H23 <sub>2</sub> ,<br>H35 <sub>1</sub>  | 5.17  | FR796806–FR796809; FR797023–FR797026;<br>FR797241–FR797244; FR797459–FR797462;<br>FR797677–FR797680 |
| 47 | SRA | AT: Schrankogel<br>(N 47.04° E 11.09°)               | 4 | 0.97 | 1 | 4 | H35                                                       | 0.00  | FR796892–FR796895; FR797110–FR797113;<br>FR797328–FR797331; FR797546–FR797549;<br>FR797764–FR797767 |
| 48 | GRI | AT: Rietzer Griebkogel<br>(N 47.24° E 11.05°)        | 4 | 1.03 | 1 | 4 | H35                                                       | 0.00  | FR796764–FR796767; FR796982–FR796985;<br>FR797200–FR797203; FR797418–FR797421;<br>FR797636–FR797639 |
| 49 | HAB | AT: Habicht<br>(N 47.04° E 11.30°)                   | 4 | 0.90 | 1 | 4 | H23 <sub>2</sub> , H24 <sub>1</sub> ,<br>H35 <sub>1</sub> | 1.00  | FR796768–FR796771; FR796986–FR796989;<br>FR797204–FR797207; FR797422–FR797425;<br>FR797640–FR797643 |
| 50 | EGG | AT: Nöblachjoch, Eggersteller<br>(N 47.05° E 11.43°) | 4 | 1.32 | 1 | 4 | H34 <sub>2</sub> , H35 <sub>2</sub>                       | 0.67  | FR796733–FR796736; FR796955–FR796956;<br>FR797173–FR797174; FR797391–FR797392;<br>FR797609–FR797610 |
| 52 | BER | AT: Saurüssel<br>(N 47.03° E 11.84°)                 | 4 | 1.21 | 1 | 4 | H1 <sub>2</sub> , H13 <sub>1</sub> ,<br>H16 <sub>1</sub>  | 6.50  | FR796721–FR796724; FR796943–FR796946;<br>FR797161–FR797164; FR797379–FR797382;<br>FR797597–FR797600 |

|    |     |                                                |   |      |                      |   |                                                                              |      |                                                                                                     |
|----|-----|------------------------------------------------|---|------|----------------------|---|------------------------------------------------------------------------------|------|-----------------------------------------------------------------------------------------------------|
| 53 | RAU | IT: Rauchkofel<br>(N 47.06° E 12.09°)          | 4 | 1.10 | 1                    | 4 | H11 <sub>1</sub> , H13 <sub>1</sub> ,<br>H28 <sub>1</sub> , H35 <sub>1</sub> | 6.17 | FR796836–FR796839; FR797054–FR797057;<br>FR797272–FR797275; FR797490–FR797493;<br>FR797708–FR797711 |
| 54 | SPE | IT: Speikboden<br>(N 46.92° E 11.90°)          | 4 | 1.06 | 1                    | 4 | H3 <sub>1</sub> , H11 <sub>1</sub> ,<br>H35 <sub>2</sub>                     | 8.33 | FR796880–FR796883; FR797099–FR797102;<br>FR797317–FR797320; FR797535–FR797538;<br>FR797753–FR797756 |
| 55 | SAB | IT: Sambock<br>(N 46.85° E 11.89°)             | 4 | 1.00 | 1                    | 4 | H5 <sub>2</sub> , H35 <sub>2</sub>                                           | 7.33 | FR796852–FR796855; FR797074–FR797077;<br>FR797292–FR797295; FR797510–FR797513;<br>FR797728–FR797731 |
| 57 | ANT | IT: Antholzer Scharte<br>(N 46.89° E 12.11°)   | 4 | 1.38 | 1                    | 4 | H11 <sub>2</sub> , H33 <sub>1</sub> ,<br>H35 <sub>1</sub>                    | 7.17 | FR796705–FR796708; FR796926–FR796929;<br>FR797144–FR797147; FR797362–FR797365;<br>FR797580–FR797583 |
| 58 | STS | AT: Almerhorn<br>(N 46.90° E 12.20°)           | 4 | 1.36 | 1                    | 4 | H4 <sub>1</sub> , H20 <sub>1</sub> ,<br>H21 <sub>1</sub> , H35 <sub>1</sub>  | 6.50 | FR796902–FR796905; FR797120–FR797123;<br>FR797338–FR797341; FR797556–FR797559;<br>FR797774–FR797777 |
| 59 | RIP | IT: Riepenspitz<br>(N 46.85° E 12.29°)         | 4 | 1.08 | 1                    | 4 | H11 <sub>1</sub> , H34 <sub>1</sub> ,<br>H35 <sub>2</sub>                    | 4.50 | FR796844–FR796847; FR797066–FR797069;<br>FR797284–FR797287; FR797502–FR797505;<br>FR797720–FR797723 |
| 60 | TOB | IT: Toblacher Pfannhorn<br>(N 46.78° E 12.28°) | 4 | 1.24 | 1                    | 4 | H35                                                                          | 0.00 | FR796906–FR796909; FR797124–FR797127;<br>FR797342–FR797345; FR797560–FR797563;<br>FR797778–FR797781 |
| 62 | GOE | AT: Gölbner<br>(N 46.83° E 12.51°)             | 4 | 0.92 | 1                    | 4 | H1 <sub>2</sub> , H35 <sub>2</sub>                                           | 6.00 | FR796760–FR796763; FR796978–FR796981;<br>FR797196–FR797199; FR797414–FR797417;<br>FR797632–FR797635 |
| 63 | QUA | IT: Col Quaternà<br>(N 46.67° E 12.47°)        | 4 | 1.17 | 1                    | 4 | H1 <sub>1</sub> , H3 <sub>1</sub> ,<br>H35 <sub>2</sub>                      | 7.17 | FR796832–FR796835; FR797050–FR797053;<br>FR797268–FR797271; FR797486–FR797489;<br>FR797704–FR797707 |
| 66 | SLZ | AT: Schleinitz<br>(N 46.90° E 12.74°)          | 4 | 1.36 | 7                    | 4 | H3 <sub>1</sub> , H31 <sub>2</sub> ,<br>H35 <sub>1</sub>                     | 5.67 | FR796876–FR796879; FR797095–FR797098;<br>FR797313–FR797316; FR797531–FR797534;<br>FR797749–FR797752 |
| 68 | BOE | AT: Schönleitenspitze<br>(N 46.99° E 12.68°)   | 4 | 1.37 | 7                    | 4 | H31 <sub>2</sub> , H35 <sub>1</sub>                                          | 0.67 | FR796725–FR796728; FR796947–FR796950;<br>FR797165–FR797168; FR797383–FR797386;<br>FR797601–FR797604 |
| 69 | KAP | AT: Kapruner Törl<br>(N 47.14° E 12.67°)       | 6 | 1.41 | 4, 5, 7, 8,<br>9, 10 | 5 | H25 <sub>1</sub> , H26 <sub>1</sub> ,<br>H35 <sub>3</sub>                    | 0.80 | FR796776–FR796781; FR796994–FR796998;<br>FR797212–FR797216; FR797430–FR797434;<br>FR797648–FR797652 |



|    |     |                                           |   |      |            |   |                                                                              |      |                                                                                                     |
|----|-----|-------------------------------------------|---|------|------------|---|------------------------------------------------------------------------------|------|-----------------------------------------------------------------------------------------------------|
| 70 | SAD | AT: Sadnig<br>(N 46.95° E 12.99°)         | 4 | 1.00 | 7          | 4 | H31 <sub>1</sub> , H35 <sub>3</sub>                                          | 0.50 | FR796856–FR796859; FR797078–FR797081;<br>FR797296–FR797299; FR797514–FR797517;<br>FR797732–FR797735 |
| 71 | SCR | AT: Scharnik<br>(N 46.79° E 13.04°)       | 4 | 1.16 | 7          | 4 | H31 <sub>3</sub> , H35 <sub>1</sub>                                          | 0.50 | FR796872–FR796875; FR797091–FR797094;<br>FR797309–FR797312; FR797527–FR797530;<br>FR797745–FR797748 |
| 72 | POL | AT: Polinik<br>(N 46.89° E 13.17°)        | 4 | 1.18 | 1, 7       | 4 | H26 <sub>1</sub> , H35 <sub>3</sub>                                          | 0.50 | FR796810–FR796813; FR797027–FR797030;<br>FR797245–FR797248; FR797463–FR797466;<br>FR797681–FR797684 |
| 74 | GME | AT: Gmeineck<br>(N 46.89° E 13.43°)       | 4 | 1.12 | 7          | 4 | H29 <sub>2</sub> , H35 <sub>2</sub>                                          | 0.67 | FR796756–FR796759; FR796974–FR796977;<br>FR797192–FR797195; FR797410–FR797413;<br>FR797628–FR797631 |
| 75 | REI | AT: Reißbeck<br>(N 46.93° E 13.36°)       | 8 | 1.43 | 7          | 8 | H6 <sub>1</sub> , H7 <sub>2</sub> ,<br>H8 <sub>2</sub> , H35 <sub>3</sub>    | 4.75 | FR796840–FR796843; FR797058–FR797065;<br>FR797276–FR797283; FR797494–FR797501;<br>FR797712–FR797719 |
| 76 | ANK | AT: Ankogel<br>(N 47.05° E 13.24°)        | 4 | 1.20 | 7          | 4 | H35                                                                          | 0.00 | FR796701–FR796704; FR796922–FR796925;<br>FR797140–FR797143; FR797358–FR797361;<br>FR797576–FR797579 |
| 77 | HAF | AT: Großer Hafner<br>(N 47.07° E 13.39°)  | 4 | 1.04 | 7          | 4 | H35                                                                          | 0.00 | FR796772–FR796775; FR796990–FR796993;<br>FR797208–FR797211; FR797426–FR797429;<br>FR797644–FR797647 |
| 78 | BEL | AT / SLO: Belščica<br>(N 46.44° E 14.15°) | 8 | 1.16 | 1, 2, 6, 7 | 7 | H35                                                                          | 0.00 | FR796713–FR796720; FR796936–FR796942;<br>FR797154–FR797160; FR797372–FR797378;<br>FR797590–FR797596 |
| 79 | ROS | AT: Rosennock<br>(N 46.87° E 13.72°)      | 4 | 1.25 | 7          | 4 | H27 <sub>1</sub> , H32 <sub>1</sub> ,<br>H35 <sub>2</sub>                    | 1.00 | FR796848–FR796851; FR797070–FR797073;<br>FR797288–FR797291; FR797506–FR797509;<br>FR797724–FR797727 |
| 80 | BRE | AT: Bretthöhe<br>(N 46.91° E 13.90°)      | 4 | 1.05 | 7          | 4 | H35                                                                          | 0.00 | FR796729–FR796732; FR796951–FR796954;<br>FR797169–FR797172; FR797387–FR797390;<br>FR797605–FR797608 |
| 82 | BAL | AT: Balonspitze<br>(N 47.12° E 13.48°)    | 4 | 1.01 | 7          | 4 | H30 <sub>1</sub> , H31 <sub>1</sub> ,<br>H32 <sub>1</sub> , H35 <sub>1</sub> | 1.50 | FR796709–FR796712; FR796932–FR796935;<br>FR797150–FR797153; FR797368–FR797371;<br>FR797586–FR797589 |
| 86 | PRE | AT: Preber<br>(N 47.22° E 13.87°)         | 4 | 1.14 | 7          | 4 | H35                                                                          | 0.00 | FR796824–FR796827; FR797042–FR797045;<br>FR797260–FR797263; FR797478–FR797481;<br>FR797696–FR797699 |

|    |     |                                              |   |      |   |   |                                     |      |                                                                                                     |
|----|-----|----------------------------------------------|---|------|---|---|-------------------------------------|------|-----------------------------------------------------------------------------------------------------|
| 87 | PRD | AT: Predigstuhl<br>(N 47.26° E 13.91°)       | 8 | 1.23 | 7 | 7 | H35                                 | 0.00 | FR796818–FR796823; FR797035–FR797041;<br>FR797253–FR797259; FR797471–FR797477;<br>FR797689–FR797695 |
| 89 | KNA | AT: Großer Knallstein<br>(N 47.32° E 13.98°) | 4 | 1.57 | 7 | 4 | H31 <sub>1</sub> , H35 <sub>3</sub> | 0.50 | FR796782–FR796785; FR796999–FR797002;<br>FR797217–FR797220; FR797435–FR797438;<br>FR797653–FR797656 |
| 92 | SCH | AT: Schießbeck<br>(N 47.27° E 14.34°)        | 6 | 1.32 | 7 | 5 | H35                                 | 0.00 | FR796864–FR796871; FR797086–FR797090;<br>FR797304–FR797308; FR797522–FR797526;<br>FR797740–FR797744 |
| 95 | PLE | AT: Großer Ringkogel<br>(N 47.31° E 14.63°)  | 4 | 1.09 | 7 | 4 | H35                                 | 0.00 | FR796802–FR796805; FR797019–FR797022;<br>FR797237–FR797240; FR797455–FR797458;<br>FR797673–FR797676 |
| 97 | ZIK | AT: Zirbitzkogel<br>(N 47.08° E 14.57°)      | 4 | 1.19 | 7 | 4 | H35                                 | 0.00 | FR796914–FR796917; FR797132–FR797135;<br>FR797350–FR797353; FR797568–FR797571;<br>FR797786–FR797789 |

<sup>a</sup>population numbers as in Sonnleitner *et al.* (2010)

<sup>b</sup>AT: Austria; CH: Switzerland; I: Italy; SLO: Slovenia

<sup>c</sup>within-population rarity of markers as frequency-down-weighted marker values calculated according to Schönswetter & Tribsch (2005)

<sup>d</sup>haplotype numbers as in Fig. 3; in case of intrapopulational polymorphism, the number of individuals with a given haplotype is indicated as subscript numbers

<sup>e</sup>number of pairwise differences among haplotypes within populations (Tajima 1983)

<sup>f</sup>nuclear ITS; plastid *petL-psbE* spacer; plastid *rpl32-trnL* spacer; plastid *psbD-trnT* spacer; plastid *rps16-trnK* spacer

**Table S2** Sampling localities and their geographic coordinates as well as GenBank accession numbers of four plastid regions for outgroup species of the *Incani* clade.

| Taxon                                  | Locality (coordinates) <sup>a</sup>                                 | GenBank accession numbers <sup>b</sup> |
|----------------------------------------|---------------------------------------------------------------------|----------------------------------------|
| <i>Senecio abrotanifolius</i> L. 1     | I: Lombardia, Sondrio (N 46°11'40" E 09°33'50")                     | HE614512; HE614440; HE614296; HE614368 |
| <i>Senecio abrotanifolius</i> L. 2     | I: Südtirol, Paso Sella (N 46°30'30" E 11°46'00")                   | HE614513; HE614441; HE614297; HE614369 |
| <i>Senecio adonidifolius</i> Loisel. 1 | F: Pyrénées-Orientales, Col de Mantet (N 42°29'00" E 02°19'00")     | HE614514; HE614442; HE614298; HE614370 |
| <i>Senecio adonidifolius</i> Loisel. 2 | F: Pyrénées-Orientales, Col de Mantet (N 42°29'00" E 02°19'00")     | HE614515; HE614443; HE614299; HE614371 |
| <i>Senecio boissieri</i> DC. 1         | E: Granada, Pico del Tosal (N 37°02'01" E 03°24'46")                | HE614516; HE614444; HE614300; HE614372 |
| <i>Senecio boissieri</i> DC. 2         | E: Granada, Mulhacén (N 37°03'12" E 03°18'42")                      | HE614517; HE614445; HE614301; HE614373 |
| <i>Senecio halleri</i> Dandy 1         | F: Rhône-Alpes, Col des Evettes (N 45°35'00" E 07°06'00")           | HE614518; HE614446; HE614302; HE614374 |
| <i>Senecio halleri</i> Dandy 2         | F: Rhône-Alpes, Col des Evettes (N 45°35'00" E 07°06'00")           | HE614519; HE614447; HE614303; HE614375 |
| <i>Senecio halleri</i> Dandy 3         | I: Piemonte, Rifugio Vittorio Emanuele II (N 45°39'00" E 07°16'00") | HE614522; HE614450; HE614306; HE614378 |
| <i>Senecio halleri</i> Dandy 4         | I: Piemonte, Rifugio Vittorio Emanuele II (N 45°39'00" E 07°16'00") | HE614525; HE614453; HE614309; HE614381 |
| <i>Senecio halleri</i> Dandy 5         | I: Aosta, Le refuge Arp (N 45°46'00" E 07°45'00")                   | HE614520; HE614448; HE614304; HE614376 |
| <i>Senecio halleri</i> Dandy 6         | I: Aosta, Le refuge Arp (N 45°46'00" E 07°45'00")                   | HE614521; HE614449; HE614305; HE614377 |
| <i>Senecio halleri</i> Dandy 7         | CH: Valais, Gornergrat (N 45°59'00" E 07°48'00")                    | HE614530; HE614458; HE614314; HE614386 |
| <i>Senecio halleri</i> Dandy 8         | CH: Valais, Gornergrat (N 45°59'00" E 07°48'00")                    | HE614531; HE614459; HE614315; HE614387 |
| <i>Senecio halleri</i> Dandy 9         | I: Piemonte, Ceppo Morelli (N 45°59'00" E 08°02'00")                | HE614523; HE614451; HE614307; HE614379 |
| <i>Senecio halleri</i> Dandy 10        | I: Piemonte, Ceppo Morelli (N 45°59'00" E 08°02'00")                | HE614524; HE614452; HE614308; HE614380 |
| <i>Senecio halleri</i> Dandy 11        | I: Piemonte, Monte Zeda (N 46°03'00" E 08°32'00")                   | HE614526; HE614454; HE614310; HE614382 |
| <i>Senecio halleri</i> Dandy 12        | I: Piemonte, Monte Zeda (N 46°03'00" E 08°32'00")                   | HE614527; HE614455; HE614311; HE614383 |
| <i>Senecio halleri</i> Dandy 13        | CH: Valais, Seehorn (N 46°10'00" E 08°07'00")                       | HE614532; HE614460; HE614316; HE614388 |
| <i>Senecio halleri</i> Dandy 14        | CH: Valais, Breithorn (N 46°18'00" E 08°05'00")                     | HE614528; HE614456; HE614312; HE614384 |
| <i>Senecio halleri</i> Dandy 15        | CH: Valais, Breithorn (N 46°18'00" E 08°05'00")                     | HE614529; HE614457; HE614313; HE614385 |
| <i>Senecio incanus</i> L. 1            | F: Alpes-Maritimes, N Col de la Lombarde (N 44°12'10" E 07°08'55")  | HE614541; HE614469; HE614325; HE614397 |
| <i>Senecio incanus</i> L. 2            | F: Alpes-Maritimes, N Col de la Lombarde (N 44°12'10" E 07°08'55")  | HE614542; HE614470; HE614326; HE614398 |

|                              |                                                                         |                                        |
|------------------------------|-------------------------------------------------------------------------|----------------------------------------|
| <i>Senecio incanus</i> L. 3  | F: Alpes-Maritimes, Cime des Trois Serrières (N 44°20'30" E 06°50'45")  | HE614545; HE614473; HE614329; HE614401 |
| <i>Senecio incanus</i> L. 4  | F: Alpes-Maritimes, Cime des Trois Serrières (N 44°20'30" E 06°50'45")  | HE614546; HE614474; HE614330; HE614402 |
| <i>Senecio incanus</i> L. 5  | F: Hautes-Alpes, Col de Vars (N 44°32'25" E 06°42'15")                  | HE614547; HE614475; HE614331; HE614403 |
| <i>Senecio incanus</i> L. 6  | F: Hautes-Alpes, Col de Vars (N 44°32'25" E 06°42'15")                  | HE614548; HE614476; HE614332; HE614404 |
| <i>Senecio incanus</i> L. 7  | F: Hautes-Alpes, Col Agnel - Le Pain de Sucre (N 44°41'05" E 06°58'50") | HE614535; HE614463; HE614319; HE614391 |
| <i>Senecio incanus</i> L. 8  | F: Hautes-Alpes, Col Agnel - Le Pain de Sucre (N 44°41'05" E 06°58'50") | HE614536; HE614464; HE614320; HE614392 |
| <i>Senecio incanus</i> L. 9  | I: Piemonte, Punta Cialancia (N 44°52'35" E 07°07'20")                  | HE614539; HE614467; HE614323; HE614395 |
| <i>Senecio incanus</i> L. 10 | I: Piemonte, Punta Cialancia (N 44°52'35" E 07°07'20")                  | HE614540; HE614468; HE614324; HE614396 |
| <i>Senecio incanus</i> L. 11 | F: Hautes-Alpes, Colle Basset (N Sestrière) (N 44°59'45" E 06°52'30")   | HE614543; HE614471; HE614327; HE614399 |
| <i>Senecio incanus</i> L. 12 | F: Hautes-Alpes, Colle Basset (N Sestrière) (N 44°59'45" E 06°52'30")   | HE614544; HE614472; HE614328; HE614400 |
| <i>Senecio incanus</i> L. 13 | F: Hautes-Alpes, Col de Laurichard (N 45°06'20" E 06°24'00")            | HE614561; HE614489; HE614345; HE614417 |
| <i>Senecio incanus</i> L. 14 | F: Hautes-Alpes, Col de Laurichard (N 45°06'20" E 06°24'00")            | HE614562; HE614490; HE614346; HE614418 |
| <i>Senecio incanus</i> L. 15 | I: Piemonte, Colle Sommeiller (N 45°07'50" E 06°50'10")                 | HE614565; HE614493; HE614349; HE614421 |
| <i>Senecio incanus</i> L. 16 | I: Piemonte, Colle Sommeiller (N 45°07'50" E 06°50'10")                 | HE614566; HE614494; HE614350; HE614422 |
| <i>Senecio incanus</i> L. 17 | I: Piemonte, Monte Palon (N 45°12'30" E 07°08'40")                      | HE614563; HE614491; HE614347; HE614419 |
| <i>Senecio incanus</i> L. 18 | I: Piemonte, Monte Palon (N 45°12'30" E 07°08'40")                      | HE614564; HE614492; HE614348; HE614420 |
| <i>Senecio incanus</i> L. 19 | F: Savoie, Col de l'Iseran (N 45°25'05" E 07°01'55")                    | HE614549; HE614477; HE614333; HE614405 |
| <i>Senecio incanus</i> L. 20 | F: Savoie, Col de l'Iseran (N 45°25'05" E 07°01'55")                    | HE614550; HE614478; HE614334; HE614406 |
| <i>Senecio incanus</i> L. 21 | I: Piemonte, Grajische Alpen (N 45°37'56" E 07°14'24")                  | HE614557; HE614485; HE614341; HE614413 |
| <i>Senecio incanus</i> L. 22 | F: Savoie, Petit St. Bernhard (N 45°40'20" E 06°52'40")                 | HE614551; HE614479; HE614335; HE614407 |
| <i>Senecio incanus</i> L. 23 | F: Savoie, Petit St. Bernhard (N 45°40'20" E 06°52'40")                 | HE614552; HE614480; HE614336; HE614408 |
| <i>Senecio incanus</i> L. 24 | F: Savoie, Petit St. Bernhard (N 45°40'20" E 06°52'40")                 | HE614558; HE614486; HE614342; HE614414 |
| <i>Senecio incanus</i> L. 25 | CH: Valais, Grand St. Bernhard (N 45°52'50" E 07°10'12")                | HE614555; HE614483; HE614339; HE614411 |
| <i>Senecio incanus</i> L. 26 | CH: Valais, Grand St. Bernhard (N 45°52'50" E 07°10'12")                | HE614556; HE614484; HE614340; HE614412 |
| <i>Senecio incanus</i> L. 27 | CH: Valais, Grosser St. Bernhard-Pass (N 45°55'30" E 07°15'14")         | HE614577; HE614505; HE614361; HE614433 |
| <i>Senecio incanus</i> L. 28 | CH: Valais, Grosser St. Bernhard-Pass (N 45°55'30" E 07°15'14")         | HE614578; HE614506; HE614362; HE614434 |
| <i>Senecio incanus</i> L. 29 | CH: Valais, Grosser St. Bernhard-Pass (N 45°55'30" E 07°15'14")         | HE614579; HE614507; HE614363; HE614435 |

---

|                                   |                                                                          |                                        |
|-----------------------------------|--------------------------------------------------------------------------|----------------------------------------|
| <i>Senecio incanus</i> L. 30      | CH: Valais, Grosser St. Bernhard-Pass (N 45°55'30" E 07°15'14")          | HE614580; HE614508; HE614364; HE614436 |
| <i>Senecio incanus</i> L. 31      | F: Haute-Savoie, Le Brevent (N 45°56'10" E 06°51'00")                    | HE614574; HE614502; HE614358; HE614430 |
| <i>Senecio incanus</i> L. 32      | F: Haute-Savoie, Le Brevent (N 45°56'10" E 06°51'00")                    | HE614575; HE614503; HE614359; HE614431 |
| <i>Senecio incanus</i> L.33       | CH: Valais, Gornergrat (N 45°59'00" E 07°48'00")                         | HE614537; HE614465; HE614321; HE614393 |
| <i>Senecio incanus</i> L.34       | CH: Valais, Gornergrat (N 45°59'00" E 07°48'00")                         | HE614538; HE614466; HE614322; HE614394 |
| <i>Senecio incanus</i> L. 35      | CH: Valais, Rifelhorn (N 45°59'00" E 07°48'00")                          | HE614553; HE614481; HE614337; HE614409 |
| <i>Senecio incanus</i> L. 36      | CH: Valais, Rifelhorn (N 45°59'00" E 07°48'00")                          | HE614554; HE614482; HE614338; HE614410 |
| <i>Senecio incanus</i> L. 37      | CH: Valais, Montagne d'Arolla (N 46°00'56" E 07°26'14")                  | HE614571; HE614499; HE614355; HE614427 |
| <i>Senecio incanus</i> L. 38      | CH: Valais, Montagne d'Arolla (N 46°00'56" E 07°26'14")                  | HE614572; HE614500; HE614356; HE614428 |
| <i>Senecio incanus</i> L. 39      | CH: Valais, Montagne d'Arolla (N 46°00'56" E 07°26'14")                  | HE614573; HE614501; HE614357; HE614429 |
| <i>Senecio incanus</i> L. 40      | CH: Valais, Simplon (N 46°15'28" E 08°04'51")                            | HE614576; HE614504; HE614360; HE614432 |
| <i>Senecio incanus</i> L. 41      | CH: Ticino, Nufenenstock (N 46°28'45" E 08°23'15")                       | HE614533; HE614461; HE614317; HE614389 |
| <i>Senecio incanus</i> L. 42      | CH: Ticino, Nufenenstock (N 46°28'45" E 08°23'15")                       | HE614534; HE614462; HE614318; HE614390 |
| <i>Senecio incanus</i> L. 43      | CH: Ticino, Nufenenstock (N 46°28'45" E 08°23'15")                       | HE614559; HE614487; HE614343; HE614415 |
| <i>Senecio incanus</i> L. 44      | CH: Ticino, Nufenenstock (N 46°28'45" E 08°23'15")                       | HE614560; HE614488; HE614344; HE614416 |
| <i>Senecio leucophyllus</i> DC. 1 | F: Pyrénées-Orientales, Puigmal d'Err (N 42°22'59" E 02°07'01")          | HE614582; HE614510; HE614366; HE614438 |
| <i>Senecio leucophyllus</i> DC. 2 | F: Pyrénées-Orientales, Petit Puigmal de Sègre (N 42°23'00" E 02°07'00") | HE614567; HE614495; HE614351; HE614423 |
| <i>Senecio leucophyllus</i> DC. 3 | F: Pyrénées-Orientales, Petit Puigmal de Sègre (N 42°23'00" E 02°07'00") | HE614568; HE614496; HE614352; HE614424 |
| <i>Senecio leucophyllus</i> DC. 4 | F: Pyrénées-Orientales, Pic du Canigou (N 42°30'30" E 02°26'00")         | HE614583; HE614511; HE614367; HE614439 |
| <i>Senecio leucophyllus</i> DC. 5 | F: Ardèche, Mont Mézenc (N 44°54'48" E 04°11'27")                        | HE614581; HE614509; HE614365; HE614437 |
| <i>Senecio personii</i> De Not. 1 | I: Piemonte, Viozene (N 44°08'45" E 07°47'05")                           | HE614569; HE614497; HE614353; HE614425 |
| <i>Senecio personii</i> De Not. 2 | I: Piemonte, Viozene (N 44°08'45" E 07°47'05")                           | HE614570; HE614498; HE614354; HE614426 |

<sup>b</sup>CH: Switzerland; E: Spain; F: France; I: Italy

<sup>f</sup>nuclear ITS; plastid *petL-psbE* spacer; plastid *rpl32-trnL* spacer; plastid *psbD-trnT* spacer; plastid *rps16-trnK* spacer

**Table S3** Newly designed internal primers for amplification of three plastid spacer regions.

| Region            | Primer                                    |
|-------------------|-------------------------------------------|
| <i>psbD-trnT</i>  | psbD-F2 5'-GTACATCAAGCTGCGGTCTG-3'        |
|                   | trnT-R2 5'-GGTAGAGCACTCCTATGGTAAGG-3'     |
| <i>rps16-trnK</i> | rps16-F2 5'-ATATGCATATGCAGTGCCAATCC-3'    |
|                   | trnK-R2 5'-CTCTACCGTTGAGTTAGCAACCC-3'     |
| <i>psbE-petL</i>  | psbE-F2 5'-CATATTCTTGTACAGTCAAAAGG-3'     |
|                   | petL-R2 5'-TATGTTCTTTTATACATATGTTTATAA-3' |

**Table S4** Sequence statistics.

| Region                      | Sequence length <sup>a</sup> | Alignment length | Gaps | Informative positions (with/without outgroups) |
|-----------------------------|------------------------------|------------------|------|------------------------------------------------|
| ITS                         | 865-866                      | 866              | 1    | 10/17                                          |
| <i>psbD-trnT</i>            | 670-681                      | 672              | 5    | 4/3                                            |
| <i>rps16-trnK</i>           | 590-602                      | 594              | 3    | 5/3                                            |
| <i>psbE-petL</i>            | 1175-1199                    | 1181             | 8    | 14/9                                           |
| <i>trnL-rpl32</i>           | 641-946                      | 931              | 2    | 15/12                                          |
| combined<br>plastid regions | —                            | 3378             | 18   | 38/27                                          |

<sup>a</sup>for samples where some regions needed to be amplified with interior primers the missing sequence stretches were assumed to be of equal length as in the majority of samples

**Table S5** Bayes Factor support for geographic diffusion rates under the reversible discrete model using (a) 13 regions (R1–R13) or (b) 8 regions (regions comprising more than one of the 13 regions distinguished in (a) have composite names) with different prior means for the truncated Poisson distribution (the row with the default value is boxed) as well as the ratio of the maximum (indicated in bold) to the minimum Bayes Factor support (indicated in italics) for a given rate (see text for details). Those connections, which have rates supported by Bayes Factors of at least 3 with the default mean ( $\ln 2 = 0.693$ ) for the truncated Poisson prior (see text for details), are shown left of the grey bar and have the smallest and largest Bayes Factors indicated in italics and bold, respectively, and Bayes Factors below 3 are indicated by underlining. Connections, which are supported only under higher means for the truncated Poisson prior, are shown to the right of the grey bar.

**(a)**

| mean    | R1-R2        | R1-R3       | R2-R3       | R3-R7       | R4-R5        | R5-R6        | R6-R7        | R6-R8       | R7-R8        | R8-R9        | R9-R10       |  | R2-R7 | R4-R6 | R8-R11 | R9-R11 | R11-R12 |
|---------|--------------|-------------|-------------|-------------|--------------|--------------|--------------|-------------|--------------|--------------|--------------|--|-------|-------|--------|--------|---------|
| 0.1     | <i>6.64</i>  | <i>4.11</i> | <b>5.84</b> | <b>5.91</b> | <i>16.19</i> | <i>21.41</i> | <i>4.37</i>  | <b>4.13</b> | <i>11.75</i> | <i>19.88</i> | <i>14.93</i> |  |       |       |        |        |         |
| 0.693   | 8.03         | 4.99        | 5.41        | 4.53        | 17.97        | 24.91        | 6.05         | 3.43        | 12.26        | 20.71        | <i>14.62</i> |  |       |       |        |        |         |
| 1       | 8.56         | 4.91        | 5.10        | 3.82        | 18.62        | 28.84        | 6.60         | 3.20        | 14.02        | 29.76        | 16.25        |  | 3.76  |       |        |        |         |
| 2       | 9.04         | 6.18        | 4.86        | 3.38        | 20.57        | 33.61        | 8.78         | <u>2.84</u> | 15.73        | 29.60        | 16.64        |  | 4.35  |       |        |        |         |
| 5       | 11.77        | 7.13        | 4.56        | <u>2.76</u> | 22.73        | 42.67        | 12.11        | <u>2.94</u> | 17.72        | 31.81        | 20.97        |  | 6.17  | 3.47  |        |        |         |
| 10      | <b>15.41</b> | <b>9.47</b> | <i>4.50</i> | 3.00        | <b>27.27</b> | <b>56.71</b> | <b>17.31</b> | 3.31        | <b>23.00</b> | <b>35.04</b> | <b>31.81</b> |  | 7.77  | 4.31  | 3.02   | 3.12   | 3.23    |
| max/min | 2.32         | 2.30        | 1.30        | 2.14        | 1.68         | 2.65         | 3.96         | 1.45        | 1.96         | 1.76         | 2.18         |  |       |       |        |        |         |

**(b)**

| mean    | R1-R2       | R2-R7       | R(3-5)-R6     | R6-R7       | R7-R(8-9)    | R(8-9)-R(10-12) |  |
|---------|-------------|-------------|---------------|-------------|--------------|-----------------|--|
| 0.1     | 5.15        | 3.89        | <i>135.67</i> | <i>3.67</i> | <i>15.24</i> | <b>118.24</b>   |  |
| 0.693   | 5.32        | 4.52        | 181.70        | 5.81        | 21.02        | 77.05           |  |
| 1       | 5.15        | <b>4.59</b> | 191.89        | 6.88        | 24.60        | 75.36           |  |
| 2       | <b>5.71</b> | 4.23        | 221.42        | 7.16        | 25.05        | 53.81           |  |
| 5       | 5.11        | 3.86        | <b>239.27</b> | <b>8.92</b> | <b>28.74</b> | 37.50           |  |
| 10      | <i>4.30</i> | <i>3.15</i> | 199.30        | 8.50        | 23.81        | 22.99           |  |
| max/min | 1.33        | 1.46        | 1.76          | 2.43        | 1.89         | 5.14            |  |

**Table S6** Bayes Factor support for geographic diffusion rates under the non-reversible discrete model using (a) 13 regions (R1–R13) or (b) 8 regions (regions comprising more than one of the 13 regions distinguished in (a) have composite names) with different prior means for the truncated Poisson distribution (the row with the default value is boxed) as well as the ratio of the maximum (indicated in bold) to the minimum Bayes Factor support (indicated in italics) for a given rate (see text for details).

**(a)**

| mean    | R1→R2          | R1→R3         | R2→R1         | R2→R3         | R2→R7          | R3→R1         | R3→R2          | R3→R7         | R4→R5         | R4→R6         | R5→R4          | R5→R6         |
|---------|----------------|---------------|---------------|---------------|----------------|---------------|----------------|---------------|---------------|---------------|----------------|---------------|
| 0.1     | <b>1559.39</b> | <b>865.66</b> | <b>227.96</b> | <b>417.71</b> | <b>2579.39</b> | <b>360.58</b> | <b>1250.05</b> | <b>494.75</b> | <b>168.29</b> | <b>164.42</b> | <b>2431.24</b> | <b>534.74</b> |
| 1       | 797.64         | 18.56         | 11.15         | 28.71         | 411.02         | 259.17        | 21.72          | 29.31         | 59.96         | 29.57         | 156.26         | 77.85         |
| 2       | 305.59         | 15.95         | 8.73          | 21.65         | 145.53         | 79.31         | 12.42          | 27.97         | 39.79         | 15.83         | 64.94          | 42.96         |
| 5       | 62.10          | 12.05         | 5.56          | 7.46          | 48.41          | 22.47         | 9.16           | 10.33         | 15.38         | 8.37          | 27.47          | 19.74         |
| 10      | 24.97          | 8.23          | 3.85          | 5.00          | 18.30          | 7.19          | 5.14           | 7.01          | 8.91          | 5.39          | 11.85          | 14.26         |
| 12      | <i>16.80</i>   | <i>7.65</i>   | <i>3.23</i>   | <i>3.84</i>   | <i>14.72</i>   | <i>5.44</i>   | <i>4.36</i>    | <i>5.52</i>   | <i>7.39</i>   | <i>4.65</i>   | <i>9.32</i>    | <i>11.94</i>  |
| max/min | 92.82          | 113.16        | 70.58         | 108.78        | 175.23         | 66.28         | 286.71         | 89.63         | 22.77         | 35.36         | 260.86         | 44.79         |

  

| mean    | R6→R4         | R6→R5          | R7→R6         | R7→R8          | R8→R7        | R8→R9         | R9→R8         | R9→R10         | R10→R9        | R11→R12       | R11→R13       | R12→R11      | R12→R13      |
|---------|---------------|----------------|---------------|----------------|--------------|---------------|---------------|----------------|---------------|---------------|---------------|--------------|--------------|
| 0.1     | <b>667.25</b> | <b>1651.98</b> | <b>791.19</b> | <b>2602.09</b> | <b>50.36</b> | <b>927.04</b> | <b>200.37</b> | <b>2183.40</b> | <b>720.60</b> | <b>270.99</b> | <b>259.40</b> | 41.96        | <b>90.71</b> |
| 1       | 32.94         | 195.27         | 96.31         | 290.18         | 14.84        | 252.93        | 18.50         | 350.19         | 36.95         | 40.29         | 58.38         | <b>50.39</b> | 42.66        |
| 2       | 21.15         | 86.41          | 56.64         | 108.89         | 7.74         | 158.15        | 12.21         | 125.45         | 19.55         | 27.47         | 16.55         | 13.89        | 20.86        |
| 5       | 8.57          | 39.09          | 26.51         | 43.68          | 6.59         | 45.58         | 9.07          | 49.54          | 11.15         | 9.64          | 7.79          | 7.76         | 8.02         |
| 10      | 4.53          | 17.48          | 14.49         | 17.44          | 5.26         | 20.03         | 6.41          | 22.44          | 6.39          | 4.31          | 4.11          | 3.77         | 3.72         |
| 12      | <i>3.65</i>   | <i>14.46</i>   | <i>11.90</i>  | <i>15.24</i>   | <i>4.20</i>  | <i>14.13</i>  | <i>5.94</i>   | <i>18.22</i>   | <i>5.41</i>   | <i>3.40</i>   | <i>3.04</i>   | <i>3.11</i>  | <i>3.04</i>  |
| max/min | 182.81        | 114.24         | 66.49         | 170.74         | 11.99        | 65.61         | 33.73         | 119.84         | 133.20        | 79.70         | 85.33         | 16.20        | 29.84        |



(b)

| mean    | R1→R2          | R1→R(3-5)    | R1→R7        | R2→R7          | R(3-5)→R6      | R6→R(3-5)     | R6→R7         | R7→R6         | R7→R(8-9)      | R(8-9)→R7    | R(8-9)→R(10-12) | R(10-12)→R(8-9) | R(10-12)→R13   |
|---------|----------------|--------------|--------------|----------------|----------------|---------------|---------------|---------------|----------------|--------------|-----------------|-----------------|----------------|
| 0.1     | <b>4069.93</b> | <b>46.28</b> | <b>30.00</b> | <b>1342.30</b> | <b>1744.76</b> | <b>189.88</b> | <b>199.35</b> | <b>144.60</b> | <b>1013.76</b> | <b>18.41</b> | <b>3458.62</b>  | <b>88.40</b>    | <b>1730.45</b> |
| 1       | 219.77         | 10.25        | 6.49         | 148.97         | 203.69         | 19.76         | 23.18         | 17.80         | 229.04         | 3.10         | 600.64          | 6.48            | 141.78         |
| 2       | 79.70          | 6.56         | 5.53         | 51.13          | 102.65         | 12.14         | 11.93         | 12.69         | 70.26          | 4.58         | 116.51          | 7.71            | 42.42          |
| 5       | 19.03          | 5.69         | 4.09         | 13.05          | 53.19          | 6.95          | 6.46          | 8.19          | 25.77          | 3.34         | 30.96           | 5.61            | 11.24          |
| 7       | 11.10          | 4.07         | 3.00         | 7.74           | 36.91          | 5.17          | 3.96          | 6.56          | 14.48          | 3.04         | 16.20           | 4.63            | 5.35           |
| 10      | 8.70           | 4.33         | 3.21         | 5.93           | 33.45          | 5.68          | 3.47          | 7.33          | 12.12          | 3.23         | 10.26           | 4.87            | 4.19           |
| max/min | 467.81         | 11.37        | 10.00        | 226.36         | 52.16          | 36.73         | 57.45         | 22.04         | 83.64          | 6.06         | 337.10          | 19.09           | 413.00         |
